# Supplementary material for: Antioxidant and anti-inflammatory peptides in dry-fermented sausages fermented with Staphylococcus simulans QB7
Source: Royal Society of Chemistry journal article supplement (doi:10.1039/d4fo03659j), 2024-01-01
Supplement: d4fo03659j2.pdf [file d4fo03659j2.pdf]

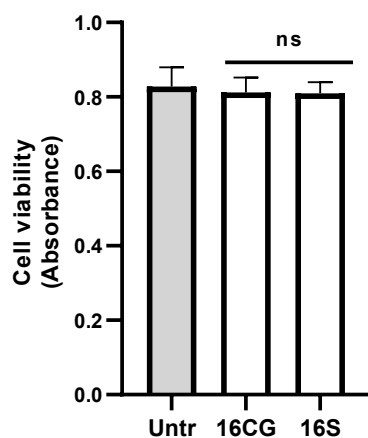

**Fig. S1.** Cell viability at 5 mg/mL concentrations of sausages peptides extracts. EA.hy926 cells were treated with sausages peptides extracts for 24 h. Cell viability was detected by the alamarBlue cell viability assay following the manufacturer's instruction. The data are expressed as mean  $\pm$  SEM of six independent experiments. Untr means control group, ns, not significant ( $P > 0.05$ )

**Table S1** The peptide sequences with potential biological activities identified from sausages fermented with *S.simulans* QB7.

| Numbers | Sequence   | Mass      | Length | m/z      | RT    | Score    |
|---------|------------|-----------|--------|----------|-------|----------|
| 1       | FPMNPPKF   | 976.484   | 8      | 489.25   | 44.2  | 0.970005 |
| 2       | GPGPWG     | 569.2598  | 6      | 570.2684 | 29.84 | 0.966921 |
| 3       | PMMP       | 474.1971  | 4      | 475.2046 | 38.48 | 0.963579 |
| 4       | FIFNL      | 652.3584  | 5      | 653.3702 | 68.25 | 0.933294 |
| 5       | FLFNL      | 652.3584  | 5      | 653.3702 | 68.25 | 0.930555 |
| 6       | PGPPL      | 479.2744  | 5      | 480.2799 | 72.72 | 0.927501 |
| 7       | APPAPPPFE  | 921.4595  | 9      | 461.7375 | 41.4  | 0.927131 |
| 8       | APPHIF     | 680.3646  | 6      | 341.1907 | 29.25 | 0.921904 |
| 9       | SGIPAGWMG  | 874.4007  | 9      | 875.4164 | 50.24 | 0.920365 |
| 10      | FRYLM      | 1240.6387 | 10     | 414.5549 | 35.15 | 0.920332 |
| 11      | FRYIM      | 728.3679  | 5      | 365.192  | 35.94 | 0.892328 |
| 12      | MPKFDLGPLL | 1129.6205 | 10     | 565.8188 | 64.12 | 0.887107 |
| 13      | DPDLPLKW   | 982.5123  | 8      | 492.2645 | 54.98 | 0.877252 |
| 14      | TFPP       | 460.2322  | 4      | 461.2432 | 28.49 | 0.858548 |
| 15      | FLFNI      | 652.3584  | 5      | 653.3702 | 68.25 | 0.841206 |
| 16      | FIFNI      | 652.3584  | 5      | 653.3702 | 68.25 | 0.837499 |
| 17      | PGPPI      | 479.2744  | 5      | 480.2799 | 72.72 | 0.836798 |
| 18      | APSADAPMFV | 1004.4637 | 10     | 503.2389 | 50.06 | 0.797692 |
| 19      | LMGL       | 432.2406  | 4      | 433.2448 | 43.65 | 0.795729 |
| 20      | FPPDVG     | 630.3013  | 6      | 631.3077 | 35.72 | 0.786813 |
| 21      | IPRLP      | 594.3853  | 5      | 298.2005 | 28.43 | 0.780286 |
| 22      | DLAHLW     | 753.381   | 6      | 754.3885 | 53.85 | 0.779784 |
| 23      | LPRLP      | 594.3853  | 5      | 298.2005 | 28.43 | 0.777391 |
| 24      | DNPGHPFI   | 895.4188  | 8      | 448.7171 | 33.09 | 0.776018 |
| 25      | IMGL       | 432.2406  | 4      | 433.2448 | 43.65 | 0.772713 |
| 26      | FVNDIF     | 753.3697  | 6      | 754.3782 | 55.37 | 0.763945 |
| 27      | FDKPVSPLL  | 1014.575  | 9      | 508.2955 | 43.29 | 0.763069 |
| 28      | VDGPSGKLWR | 1113.593  | 10     | 372.2048 | 24.33 | 0.757801 |
| 29      | ASGPINFT   | 805.397   | 8      | 806.4028 | 39.32 | 0.751915 |
| 30      | APPHIFS    | 767.3966  | 7      | 384.706  | 26.46 | 0.751584 |
| 31      | ALTPPLPPLP | 1014.6113 | 10     | 508.3142 | 58.29 | 0.745361 |
| 32      | FTL        | 379.2107  | 3      | 380.218  | 35.81 | 0.738445 |
| 33      | FDPLLQ     | 731.3854  | 6      | 732.3938 | 45.11 | 0.736968 |
| 34      | APPSVFA    | 687.3591  | 7      | 688.3705 | 36.18 | 0.734984 |
| 35      | LPDPPDIEF  | 1041.5018 | 9      | 521.7581 | 62.87 | 0.72627  |
| 36      | DPDLPLK    | 982.5123  | 8      | 492.2645 | 54.98 | 0.690812 |
| 37      | PVSFP      | 545.2849  | 5      | 546.2926 | 35.52 | 0.680993 |
| 38      | LPVHF      | 611.3431  | 5      | 306.6784 | 32.9  | 0.678257 |
| 39      | VTRPFPLG   | 885.5072  | 8      | 443.7613 | 34.32 | 0.675988 |
| 40      | PAAPL      | 467.2744  | 5      | 468.2789 | 73.45 | 0.675637 |

**Table S1 (continued)**

| Numbers | Sequence   | Mass      | Length | m/z      | RT     | Score    |
|---------|------------|-----------|--------|----------|--------|----------|
| 41      | IPVHF      | 611.3431  | 5      | 306.6784 | 32.9   | 0.674882 |
| 42      | DMNQKLF    | 894.4269  | 7      | 448.2213 | 36.21  | 0.669615 |
| 43      | HVGFDNF    | 834.366   | 7      | 418.1915 | 35.82  | 0.664108 |
| 44      | FLVG       | 434.2529  | 4      | 435.2609 | 35.44  | 0.662164 |
| 45      | DPDLP      | 555.254   | 5      | 556.2637 | 32.05  | 0.657521 |
| 46      | IPRIP      | 594.3853  | 5      | 298.2005 | 28.43  | 0.656801 |
| 47      | PVFH       | 498.259   | 4      | 499.2659 | 32.54  | 0.653959 |
| 48      | LPRIP      | 594.3853  | 5      | 298.2005 | 28.43  | 0.648772 |
| 49      | MWLPVVR    | 899.5051  | 7      | 450.7606 | 48.24  | 0.641144 |
| 50      | SEGPLKGILG | 969.5494  | 10     | 485.7822 | 42.5   | 0.641046 |
| 51      | ERDPANIKWG | 1184.5938 | 10     | 395.8724 | 25.45  | 0.633425 |
| 52      | GASLKPEF   | 1003.5338 | 10     | 502.7751 | 33.12  | 0.632333 |
| 53      | MQKIF      | 665.3571  | 5      | 666.3658 | 51.64  | 0.627711 |
| 54      | AEWDDYVPKL | 1234.5869 | 10     | 618.3005 | 58.36  | 0.62203  |
| 55      | LMGI       | 432.2406  | 4      | 433.2448 | 43.65  | 0.620108 |
| 56      | YALPHAIMR  | 1070.5695 | 9      | 357.8636 | 30.81  | 0.619706 |
| 57      | KPVSPLL    | 752.4796  | 7      | 377.2475 | 26.57  | 0.615485 |
| 58      | SPLPVI PH  | 858.4963  | 8      | 430.256  | 37.71  | 0.605844 |
| 59      | KPVSPLLLA  | 936.6008  | 9      | 469.3085 | 41.55  | 0.605842 |
| 60      | GPLKGILG   | 753.4749  | 8      | 377.7473 | 35.39  | 0.601848 |
| 61      | FIVG       | 434.2529  | 4      | 435.2609 | 35.44  | 0.598509 |
| 62      | FDPIIQ     | 731.3854  | 6      | 732.3938 | 45.11  | 0.594521 |
| 63      | DPDIP      | 555.254   | 5      | 556.2637 | 32.05  | 0.592037 |
| 64      | ANPLLEAFG  | 930.481   | 9      | 466.2521 | 62.66  | 0.587951 |
| 65      | VIWDINSF   | 992.4967  | 8      | 993.5047 | 69.27  | 0.582249 |
| 66      | DKPVSPLL   | 867.5065  | 8      | 434.7615 | 35.65  | 0.581018 |
| 67      | ADAMLKALLG | 1001.5579 | 10     | 501.7871 | 53.48  | 0.577661 |
| 68      | IMGI       | 432.2406  | 4      | 433.2448 | 43.65  | 0.574792 |
| 69      | ANPILEAFG  | 930.481   | 9      | 466.2521 | 62.66  | 0.572759 |
| 70      | YETPTGWKF  | 1127.5287 | 9      | 564.771  | 46.63  | 0.569517 |
| 71      | YVAF       | 498.2478  | 4      | 499.2578 | 34.45  | 0.566593 |
| 72      | KYLDFVFA   | 1001.5222 | 8      | 501.7661 | 48.48  | 0.564083 |
| 73      | PALGY      | 519.2693  | 5      | 520.2751 | 115.86 | 0.563386 |
| 74      | DFGSLPIK   | 962.5073  | 9      | 482.2614 | 41.48  | 0.554249 |
| 75      | PAIGY      | 519.2693  | 5      | 520.2751 | 115.86 | 0.553492 |
| 76      | VGVNGFGRIG | 974.5297  | 10     | 488.2736 | 34.46  | 0.537935 |
| 77      | FTI        | 379.2107  | 3      | 380.218  | 35.81  | 0.531163 |
| 78      | ANPLLEAFGN | 1044.5239 | 10     | 523.2707 | 62.01  | 0.523219 |
| 79      | PHQYPALTP  | 1151.561  | 10     | 576.7897 | 28.2   | 0.500366 |
